# Supplementary material for: Zfp322a Regulates Mouse ES Cell Pluripotency and Enhances Reprogramming Efficiency
Source: PLoS Genet. 2014 Feb 13;10(2):e1004038. doi: 10.1371/journal.pgen.1004038 (PMC3923668; doi:10.1371/journal.pgen.1004038)
Supplement: Table S4 — Representative enriched gene ontology terms in ChIP-seq targets. (XLSX) [file pgen.1004038.s013.xlsx]

## Sheet: Table S4
Table S4. Representative enriched gene ontology terms in ChIP-seq targets
Function groups	GO terms	No. of genes	p-value
Gene expression	gene expression	916	9.54e-53
	transcription, DNA-dependent	590	2.27e-23
	translation	133	1.71e-12
	posttranscriptional regulation of gene expression	97	9.42e-07
	transcription from RNA polymerase II promoter	247	0.008354
	translational initiation	30	0.036402
Chromatin structures	chromosome organization	175	2.25e-13
	chromatin modification	108	4.21e-05
	chromatin assembly or disassembly	35	0.000161
	nucleosome organization	31	0.000107
	histone modification	76	0.001964
Cell death	programmed cell death	332	9.29e-12
	cell death	342	5.09e-11
	apoptotic process	328	1.42e-11
	anti-apoptosis	58	0.020638
Cell proliferation	cell cycle	334	4.03e-31
	mitotic cell cycle	148	4.6e-10
	cell division	119	7.6e-08
	cell cycle arrest	75	9.01e-08
	M phase	125	3.17e-08
	chromosome segregation	51	1.2e-06
	DNA replication	72	3.53e-06
	cell cycle checkpoint	48	5.32e-06
DNA repair	response to DNA damage stimulus	148	5.09e-15
	DNA repair	101	2.58e-09
	signal transduction in response to DNA damage	32	0.003629
	DNA integrity checkpoint	28	0.008639
	DNA damage checkpoint	27	0.011558
Protein modifications	protein modification process	586	3.6e-42
	protein modification by small protein conjugation or removal	150	7.19e-19
	protein ubiquitination	119	4.17e-15
	protein phosphorylation	281	6.98e-13
	protein glycosylation	35	0.010251
RNA metabolic processes	RNA processing	175	5.14e-21
	RNA splicing	89	2.13e-12
	RNA localization	37	4.96e-06
	RNA transport	36	2.78e-06
Cellular localizaiton and transport	cellular component organization	804	4.05e-37
	establishment of localization in cell	735	1.31e-18
	organelle localization	47	1.3e-05
	cytoskeleton organization	163	0.000149
	membrane organization	78	0.001318
Development	developmental process	723	0.002337
	anatomical structure development	633	0.045452
Macromolecular complex assembly	macromolecular complex assembly	216	9.99e-11
	protein complex assembly	172	1.81e-06
	cellular macromolecular complex assembly	108	0.000128
	protein oligomerization	87	0.024279
Signal transduction	regulation of signaling	357	0.000192
	signal transduction by p53 class mediator	27	0.011558
	small GTPase mediated signal transduction	115	0.036488
